# Supplementary material for: Synthesis and properties of photoswitchable diphosphines and gold(i) complexes derived from azobenzenes
Source: Royal Society of Chemistry journal article supplement (doi:10.1039/d1dt01080h), 2021-01-01

## Electronic Supplementary Information

### Synthesis and properties of photoswitchable diphosphines and gold(I) complexes derived from azobenzenes†

Clément Cazorla,<sup>a,b</sup> Lorenzo Casimiro,<sup>b</sup> Tanzeel Arif,<sup>a,b</sup> Claire Deo,<sup>b</sup> Nawel Goual,<sup>a</sup> Pascal Retailleau,<sup>a</sup> Rémi Métivier,<sup>b</sup> Juan Xie,<sup>\*b</sup> Arnaud Voituriez,<sup>\*a</sup> Angela Marinetti<sup>\*a</sup> and Nicolas Bogliotti<sup>\*b</sup>

<sup>a</sup> Université Paris-Saclay, CNRS, Institut de Chimie des Substances Naturelles, UPR 2301, 91198, Gif-sur-Yvette, France.

<sup>b</sup> Université Paris-Saclay, ENS Paris-Saclay, CNRS, Photophysique et Photochimie Supramoléculaires et Macromoléculaires, 91190, Gif-sur-Yvette, France.

### Table of contents

|                                                                                        |           |
|----------------------------------------------------------------------------------------|-----------|
| <b>I. Photochemical characterization of 3/4/6/7.....</b>                               | <b>3</b>  |
| <b>II. Photoisomerization of the trivalent phosphine 1' .....</b>                      | <b>6</b>  |
| <b>III. DFT-optimized structures of 3/4/6/7 and 1'/1 .....</b>                         | <b>7</b>  |
| <b>IV. Dominant natural transition orbitals (NTOs) of 3/4/6/7 and 1'/1 .....</b>       | <b>10</b> |
| <b>V. NMR Spectra (<sup>1</sup>H NMR, <sup>13</sup>C NMR, <sup>31</sup>P NMR).....</b> | <b>12</b> |
| <b>VII. X-ray crystal Structure Determination .....</b>                                | <b>18</b> |

## I. Photochemical characterization of 3/4/6/7

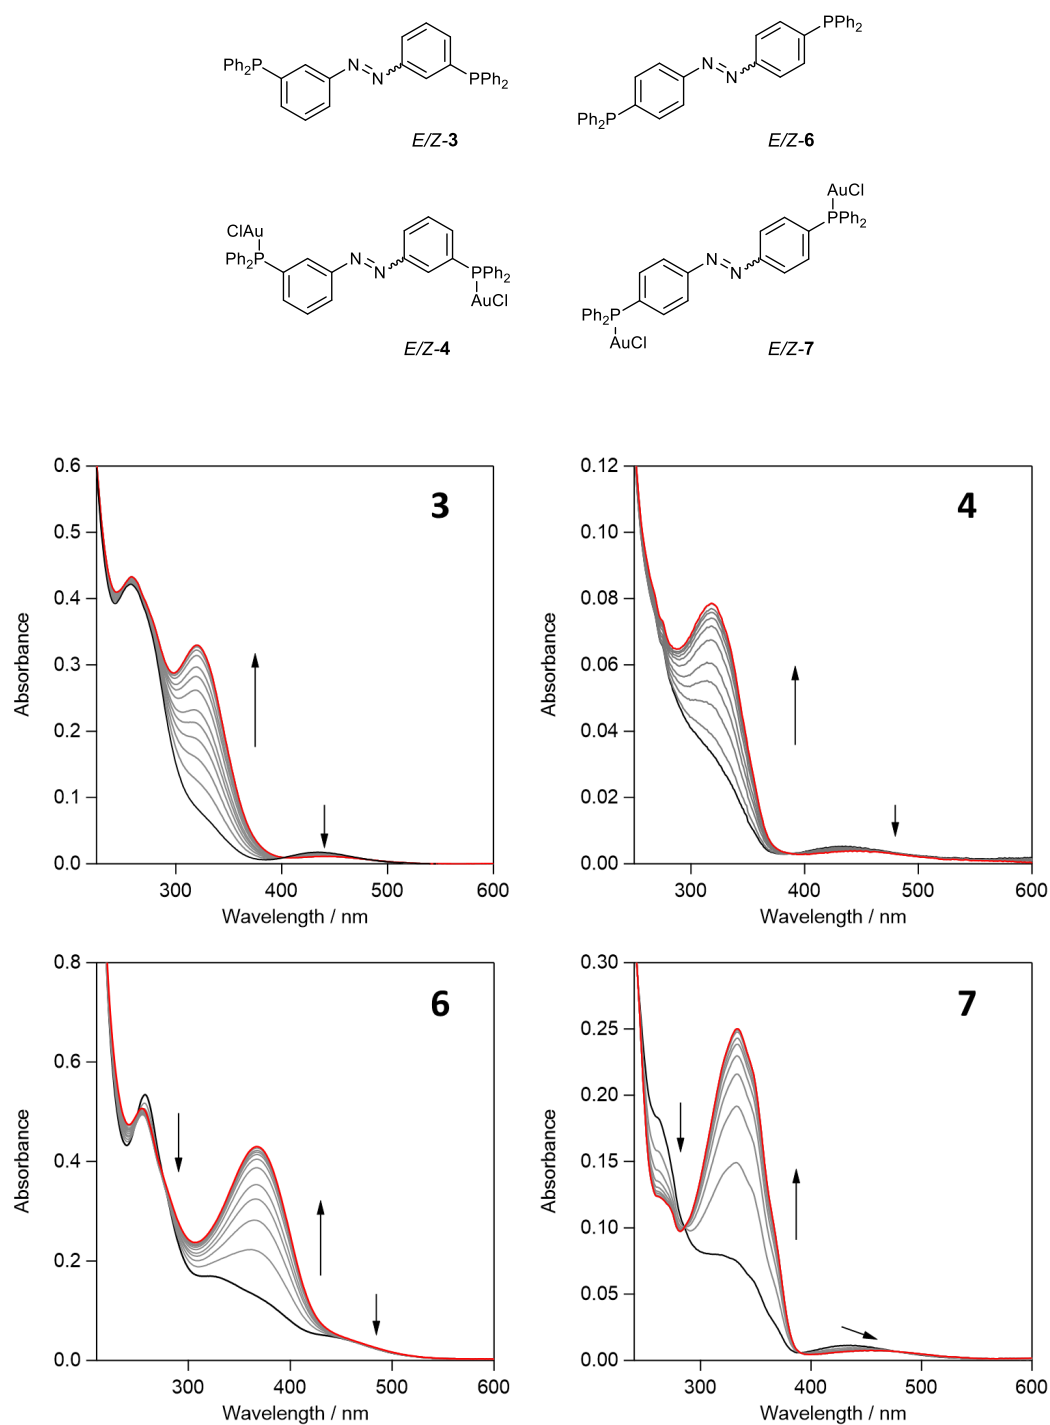

**Figure SI1:** Absorption evolutions in MeCN upon irradiation at 436 nm of **3** (top left), **4** (top right), **6** (bottom left), **7** (bottom right), previously irradiated at 365 nm.

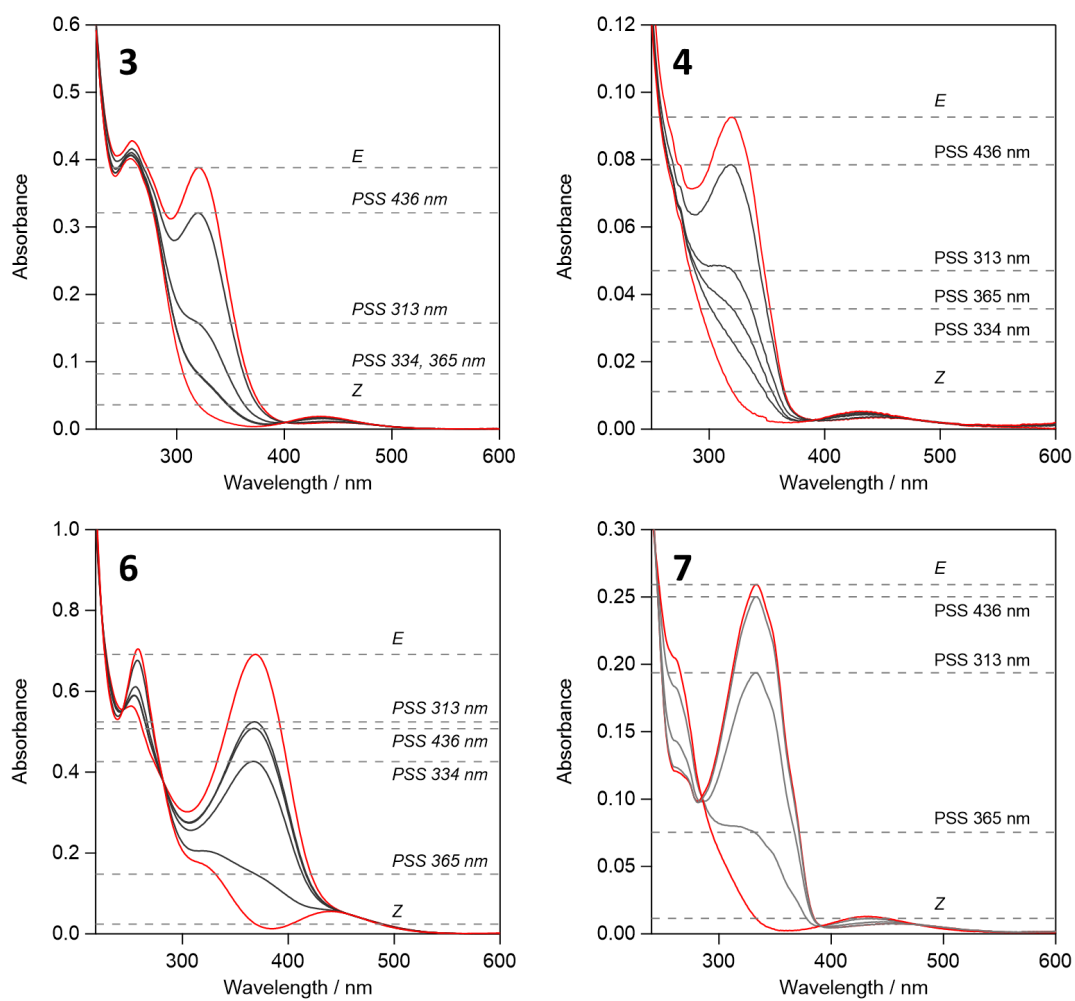

**Figure S12.** Spectra of the *E*, *Z* (red lines) and photostationary states (grey lines) of **3** (top left), **4** (top right), **6** (bottom left), **7** (bottom right).

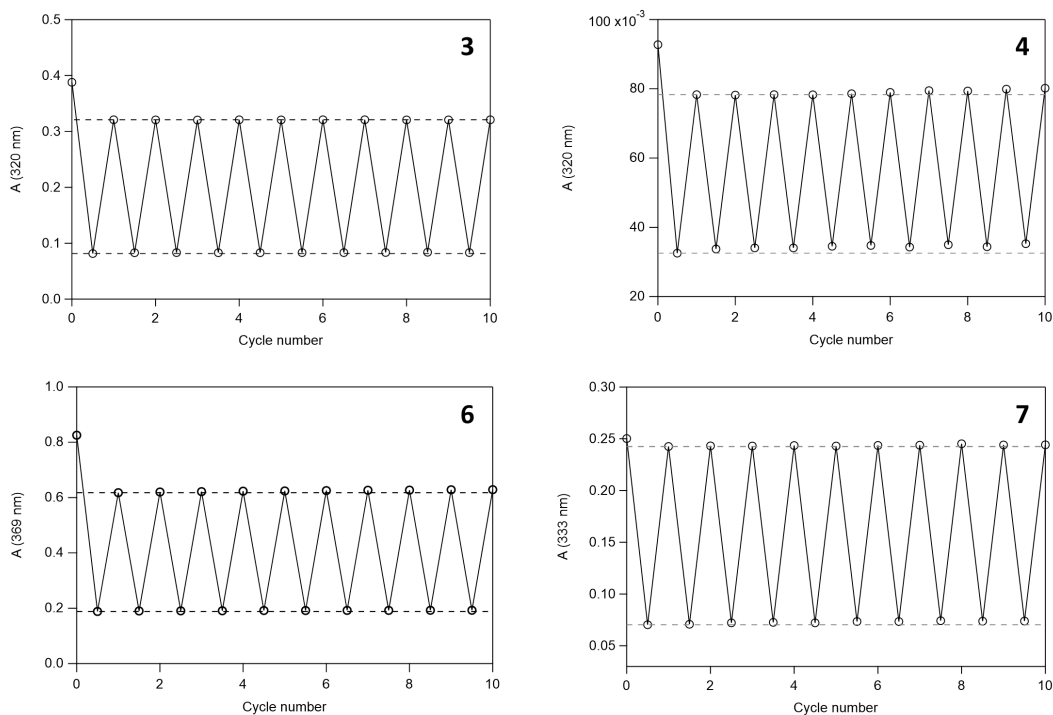

**Figure SI3:** Fatigue resistance experiments upon alternated irradiations at 365 nm and 436 nm of **3** (top left), **4** (top right), **6** (bottom left), **7** (bottom right).

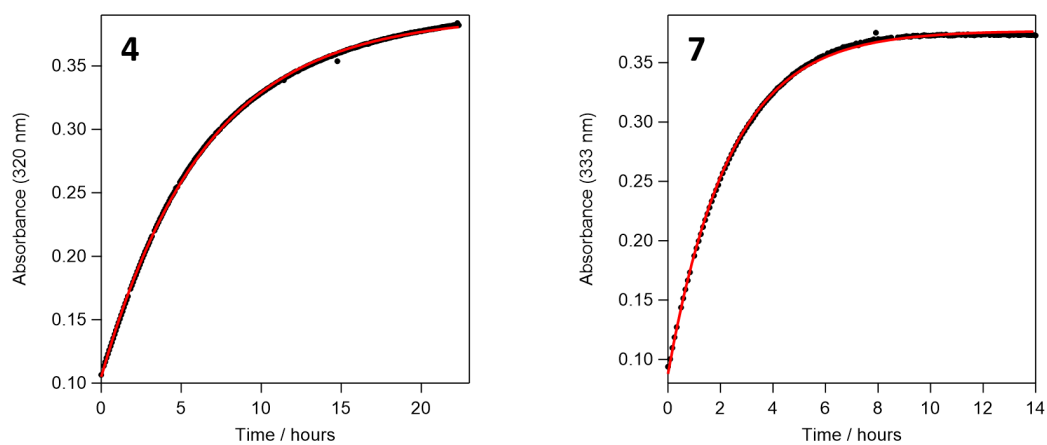

**Figure SI4:** Absorbance evolution at **4** (left, 320 nm) and **7** (right, 333 nm) in the dark, after irradiation at 365 nm, and fitting according to a first-order kinetic method (red line).

## II. Photoisomerization of the trivalent phosphine 1'

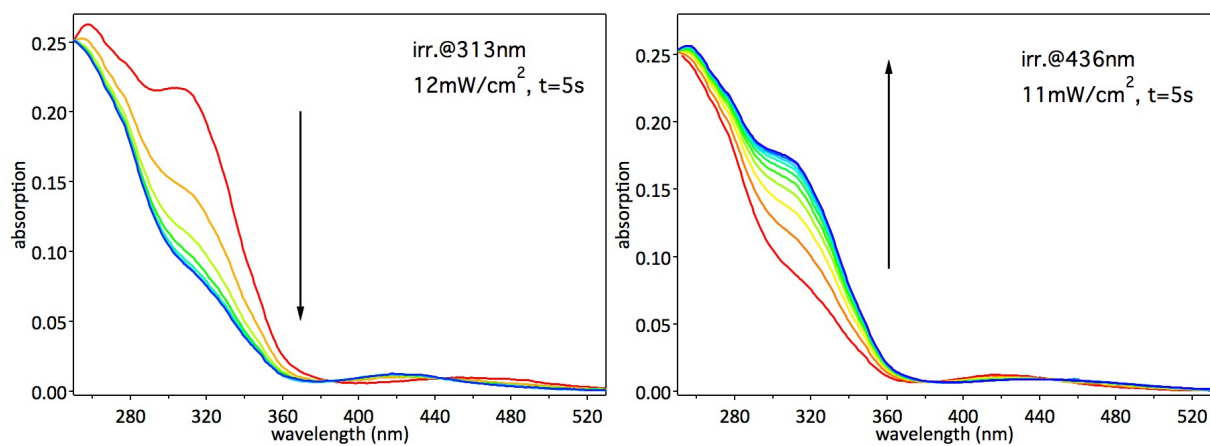

**Figure SI5.** Left: Absorption spectrum of the trivalent phosphine *E-1'* in MeCN and its stepwise evolution upon irradiation 5s pulses at 313 nm ( $P = 12 \text{ mW/cm}^2$ ). Right: Evolution of previous solution (PSS@313 nm) upon 5s irradiation pulses at 436 nm ( $P = 11 \text{ mW/cm}^2$ ).

### III. DFT-optimized structures of 3/4/6/7 and 1'/1

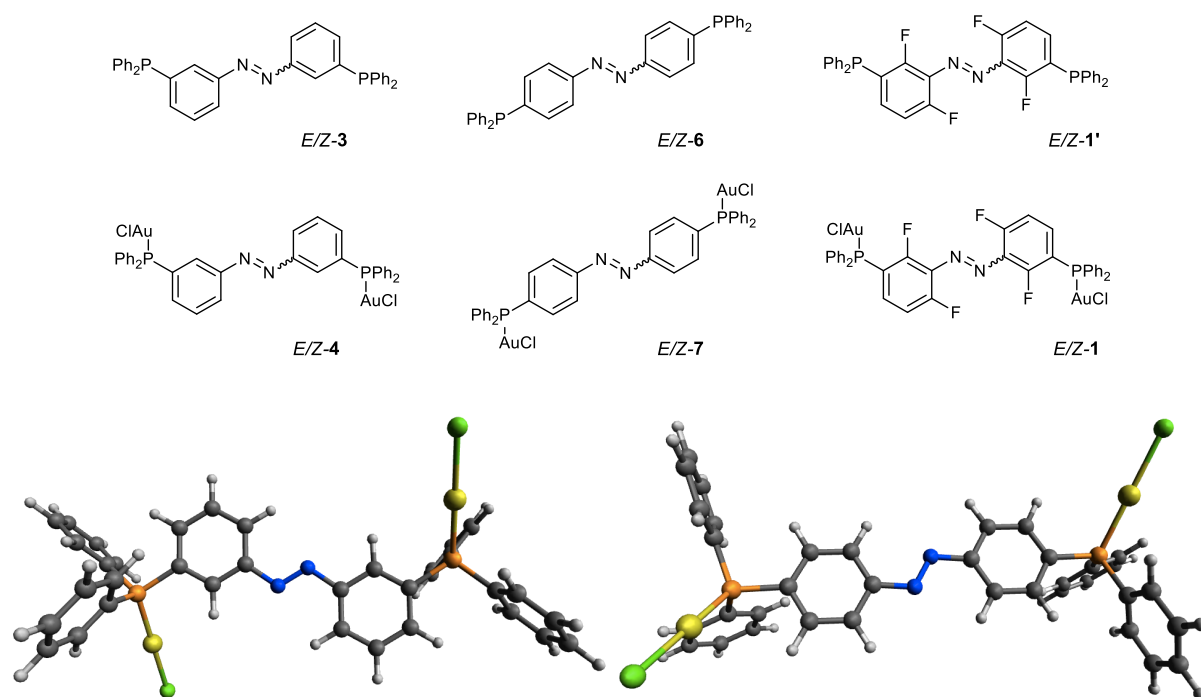

**Figure SI6.** DFT-optimized structures of complex *E-4* (left) and *E-7* (right) at the C-PCM-B3LYP/6-311G(d,p)[H,C,N,P,Cl]/ LANL2DZ[Au] level in MeCN.

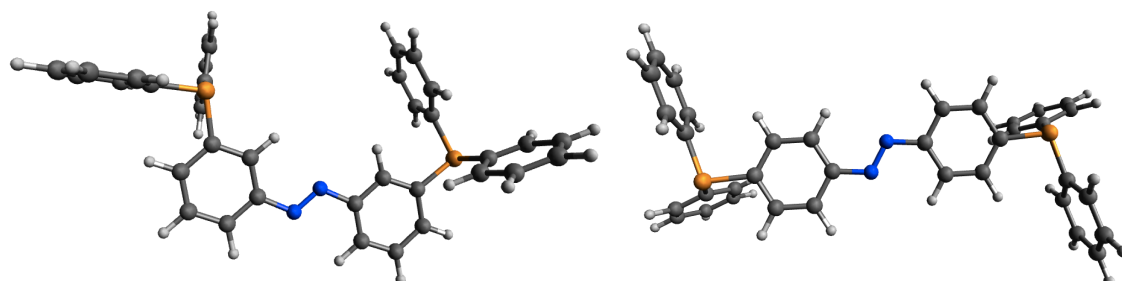

**Figure SI7.** DFT-optimized structures of trivalent phosphine *E-3* (left) and *E-6* (right) at the C-PCM-B3LYP/6-311G(d,p) level in MeCN.

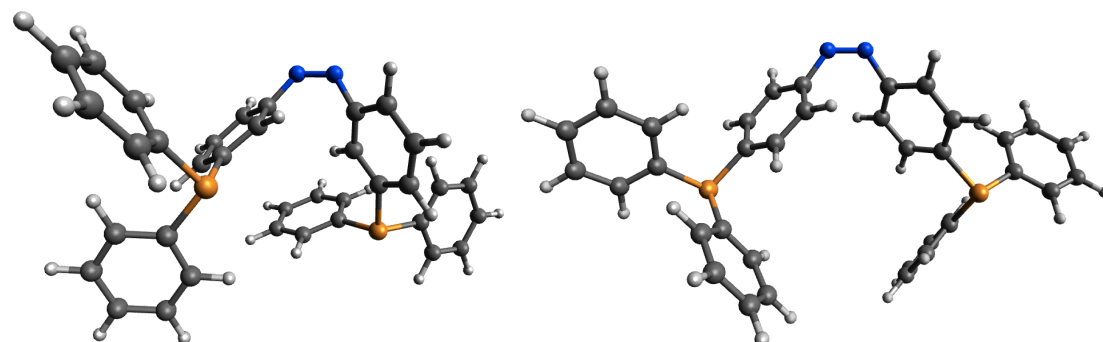

**Figure SI8.** DFT-optimized structures of trivalent phosphine *Z-3* (left) and *Z-6* (right) at the C-PCM-B3LYP/6-311G(d,p) level in MeCN.

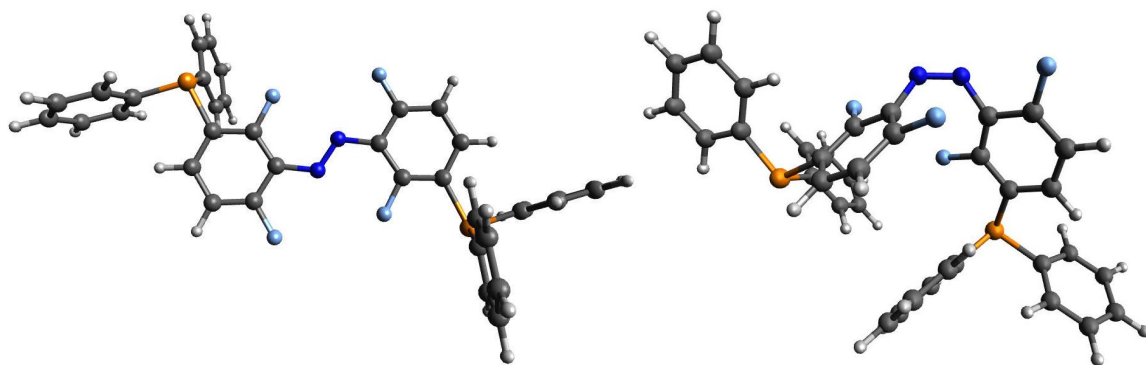

**Figure SI9.** DFT-optimized structures of trivalent phosphine *E-1'* (left) and *Z-1'* (right) at the C-PCM-B3LYP/6-311++G level in MeCN.

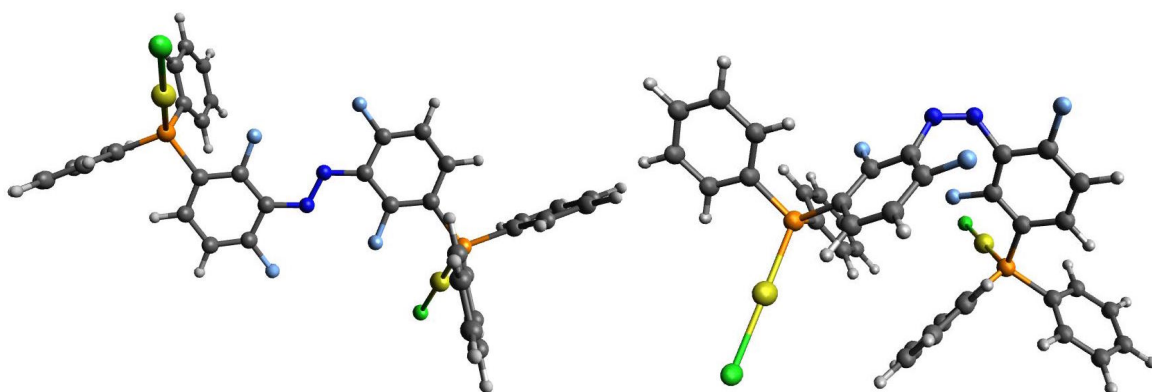

**Figure SI10.** DFT-optimized structures of gold complexes *E-1* (left) and *Z-1* (right) at the C-PCM-B3LYP/6-311++G[H,C,N,P,Cl]/ LANL2DZ[Au] level in MeCN.

**Table S11.** Calculated bond lengths (Å) and angles (deg) for the trivalent phosphines **3**, **6**, and **1'** and the corresponding gold complexes **4**, **7** and **1**.

Atom numbering

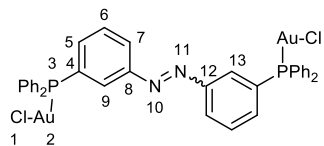

for **3**, **4**, **1'** and **1**

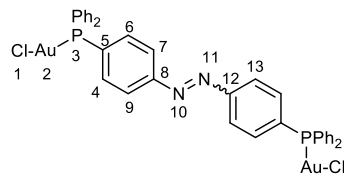

for **6** and **7**

|                                                                            | <i>E</i> - <b>3</b> <sup>a</sup> | <i>E</i> - <b>4</b> <sup>a</sup> | <i>E</i> - <b>6</b> <sup>a</sup> | <i>E</i> - <b>7</b> <sup>a</sup> | <i>E</i> - <b>1'</b> <sup>b</sup> | <i>E</i> - <b>1</b> <sup>b</sup> |
|----------------------------------------------------------------------------|----------------------------------|----------------------------------|----------------------------------|----------------------------------|-----------------------------------|----------------------------------|
| Cl(1)–Au(2)                                                                | -                                | 2.419                            | -                                | 2.419                            | -                                 | 2.440                            |
| Cl(20)–Au(19)                                                              | -                                | 2.419                            | -                                | 2.419                            | -                                 | 2.440                            |
| Au(2)–P(3)                                                                 | -                                | 2.301                            | -                                | 2.301                            | -                                 | 2.363                            |
| Au(19)–P(18)                                                               | -                                | 2.301                            | -                                | 2.301                            | -                                 | 2.363                            |
| P(3)–C(4) or P(3)–C(5)                                                     | 1.855                            | 1.835                            | 1.853                            | 1.835                            | 1.902                             | 1.880                            |
| P(18)–C(14) or P(18)–C(15)                                                 | 1.857                            | 1.835                            | 1.853                            | 1.835                            | 1.902                             | 1.880                            |
| N(10)–C(8)                                                                 | 1.419                            | 1.419                            | 1.416                            | 1.418                            | 1.413                             | 1.412                            |
| N(11)–C(12)                                                                | 1.419                            | 1.419                            | 1.416                            | 1.418                            | 1.413                             | 1.413                            |
| N(10)–N(11)                                                                | 1.254                            | 1.253                            | 1.256                            | 1.254                            | 1.281                             | 1.280                            |
| Ψ C(8)–N(10)–N(11)–C(12) <sup>c</sup>                                      | 180.0                            | 180.0                            | 179.2                            | 179.9                            | 180.0                             | 178.9                            |
| C(9)–C(8)–C(12)–C(13) <sup>c</sup>                                         | 1.1                              | 180.0                            | 172.6                            | 179.3                            | 180.0                             | 166.6                            |
| Φ C(7)–C(8)–N(10)–N(11) <sup>c</sup> or C(9)–C(8)–N(10)–N(11) <sup>c</sup> | 0.9                              | 1.2                              | 3.1                              | 0.5                              | 3.5                               | 6.7                              |

|                                                                            | <i>Z</i> - <b>3</b> <sup>a</sup> | <i>Z</i> - <b>4</b> <sup>a</sup> | <i>Z</i> - <b>6</b> <sup>a</sup> | <i>Z</i> - <b>7</b> <sup>a</sup> | <i>Z</i> - <b>1'</b> <sup>b</sup> | <i>Z</i> - <b>1</b> <sup>b</sup> |
|----------------------------------------------------------------------------|----------------------------------|----------------------------------|----------------------------------|----------------------------------|-----------------------------------|----------------------------------|
| Cl(1)–Au(2)                                                                | -                                | 2.417                            | -                                | 2.419                            | -                                 | 2.440                            |
| Cl(20)–Au(19)                                                              | -                                | 2.418                            | -                                | 2.419                            | -                                 | 2.439                            |
| Au(2)–P(3)                                                                 | -                                | 2.303                            | -                                | 2.301                            | -                                 | 2.364                            |
| Au(19)–P(18)                                                               | -                                | 2.302                            | -                                | 2.301                            | -                                 | 2.364                            |
| P(3)–C(4) or P(3)–C(5)                                                     | 1.857                            | 1.837                            | 1.853                            | 1.833                            | 1.897                             | 1.877                            |
| P(18)–C(14) or P(18)–C(15)                                                 | 1.856                            | 1.835                            | 1.853                            | 1.833                            | 1.902                             | 1.881                            |
| N(10)–C(8)                                                                 | 1.436                            | 1.437                            | 1.434                            | 1.434                            | 1.439                             | 1.439                            |
| N(11)–C(12)                                                                | 1.437                            | 1.437                            | 1.434                            | 1.434                            | 1.438                             | 1.438                            |
| N(10)–N(11)                                                                | 1.244                            | 1.243                            | 1.245                            | 1.243                            | 1.267                             | 1.265                            |
| Ψ C(8)–N(10)–N(11)–C(12) <sup>c</sup>                                      | 9.4                              | 8.5                              | 10.2                             | 9.2                              | 9.8                               | 9.7                              |
| C(9)–C(8)–C(12)–C(13) <sup>c</sup>                                         | 94.3                             | 95.2                             | 93.5                             | 95.8                             | 32.7                              | 33.4                             |
| Φ C(7)–C(8)–N(10)–N(11) <sup>c</sup> or C(9)–C(8)–N(10)–N(11) <sup>c</sup> | 49.2                             | 53.3                             | 51.1                             | 53.4                             | 57.2                              | 56.9                             |

<sup>a</sup> Calculated values from DFT optimization at the C-PCM-B3LYP/6-311G(d,p)[H,C,N,P,Cl] /LANL2DZ[Au] level in MeCN.

<sup>b</sup> Calculated values from DFT optimization at the C-PCM-B3LYP/6-311++G[H,C,N,F,P,Cl] /LANL2DZ[Au] level in MeCN.

<sup>c</sup> Absolute value.



#### IV. Dominant natural transition orbitals (NTOs) of 3/4/6/7 and 1'/1

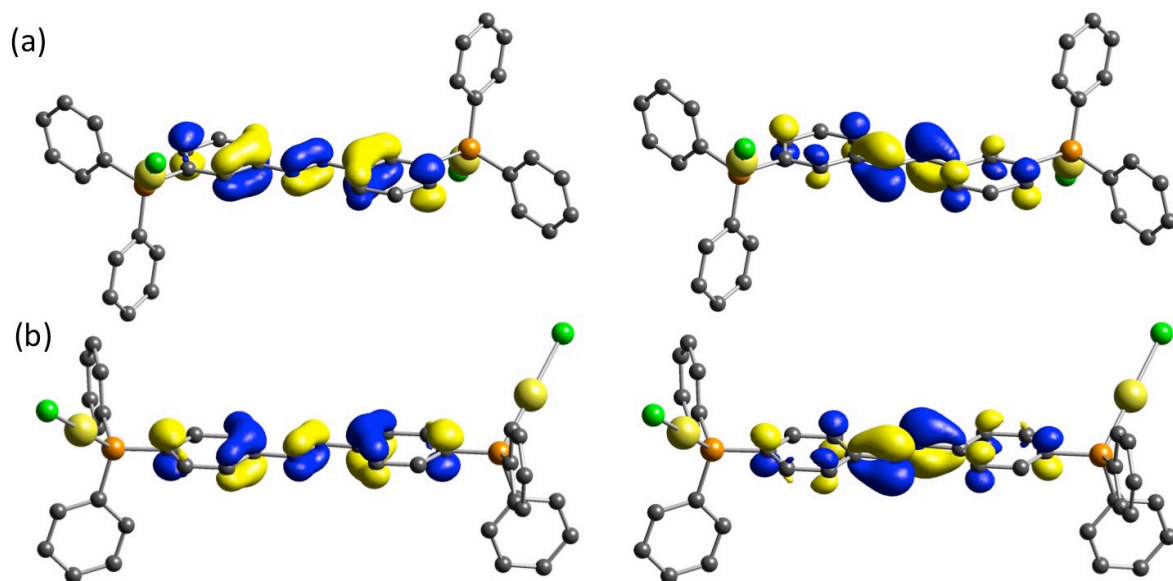

**Figure SI11.** Dominant natural transition orbitals pairs from holes (left) to particles (right) for electronic transition of (a) *E*-4 at 315 nm and (b) *E*-7 at 339 nm.

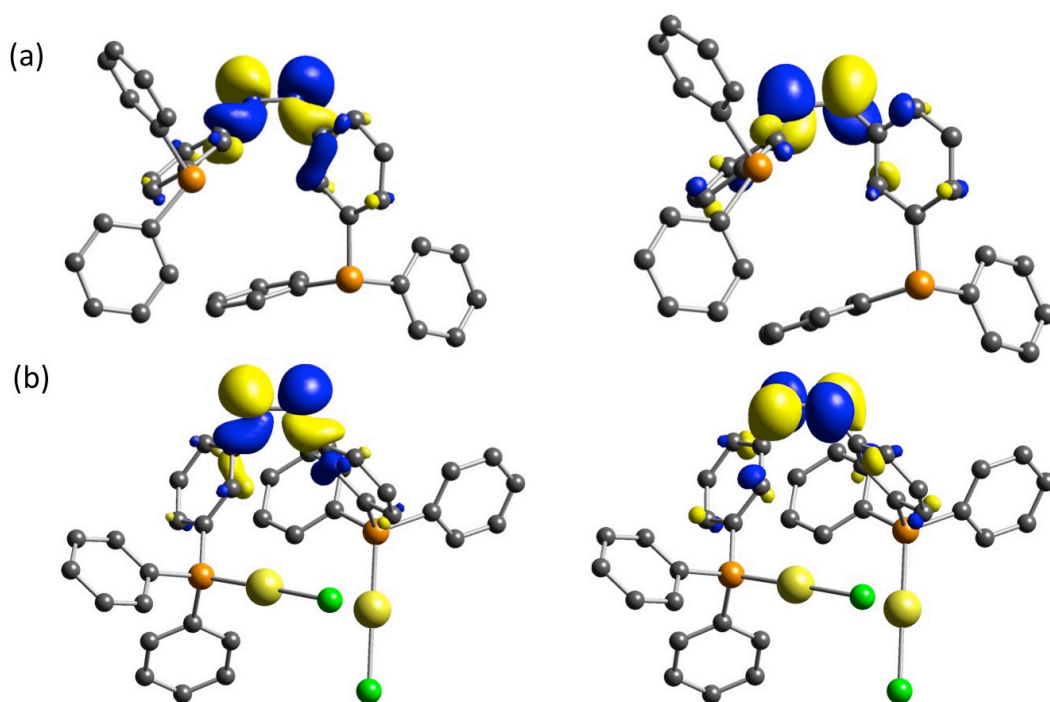

**Figure SI12.** Dominant natural transition orbitals pairs from holes (left) to particles (right) for electronic transition of (a) *Z*-3 at 456 nm and (b) *Z*-4 at 451 nm

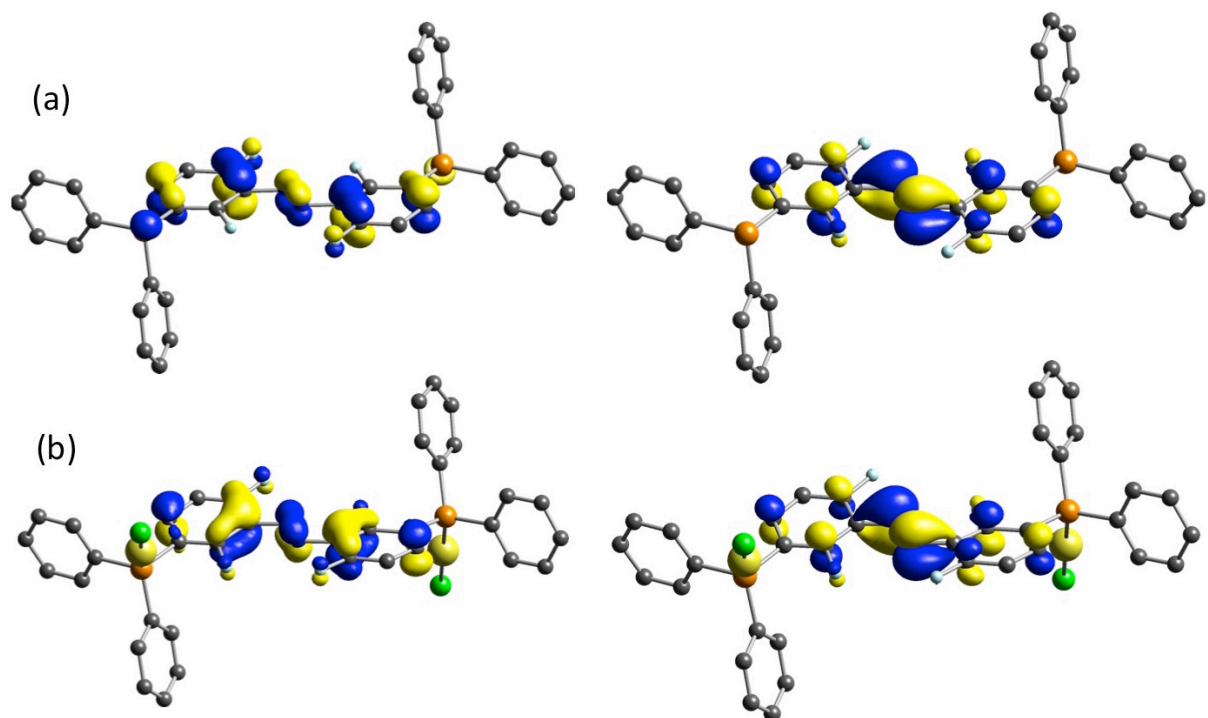

**Figure SI13.** Dominant natural transition orbitals pairs from holes (left) to particles (right) for electronic transition of (a)  $E-1'$  at 335 nm and (b)  $E-1$  at 325 nm.

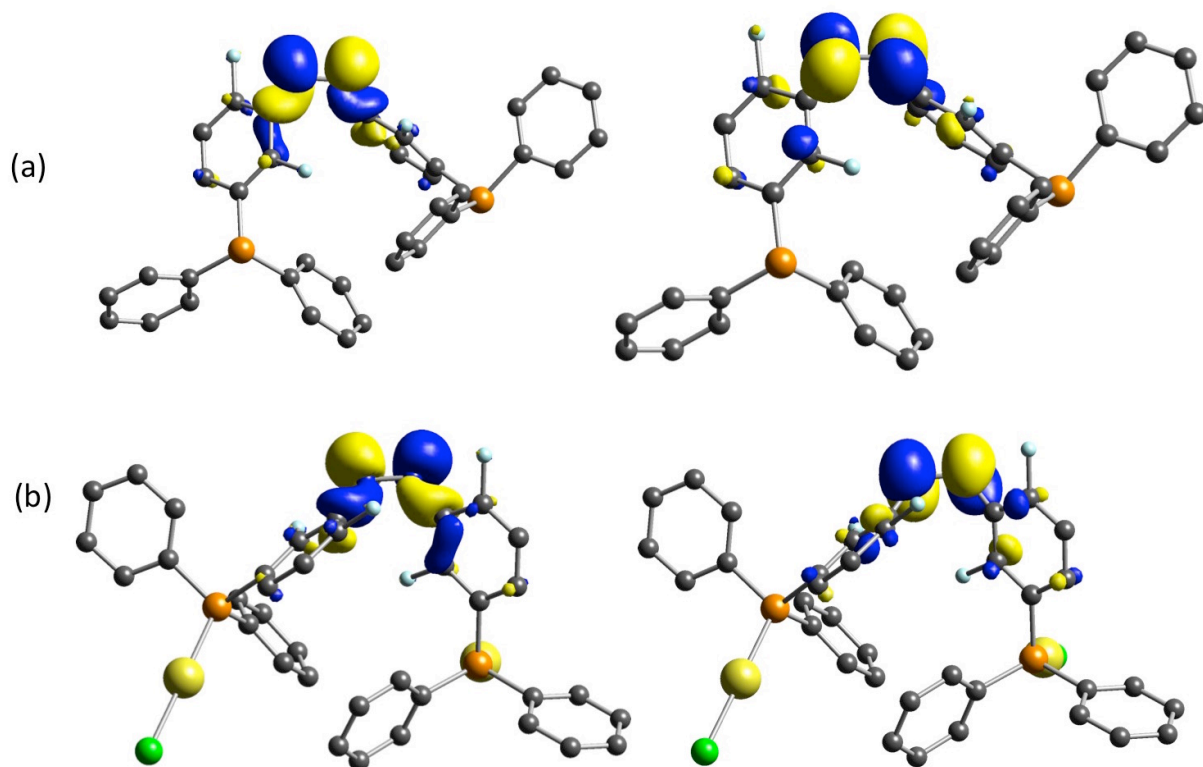

**Figure SI14.** Dominant natural transition orbitals pairs from holes (left) to particles (right) for electronic transition of (a)  $Z-1'$  at 441 nm and (b)  $Z-1$  at 441 nm.

## V. NMR Spectra ( $^1\text{H}$ NMR, $^{13}\text{C}$ NMR, $^{31}\text{P}$ NMR)

### III.1. Compound E-3

$^1\text{H}$  NMR ( $\text{CDCl}_3$ , 300 MHz):

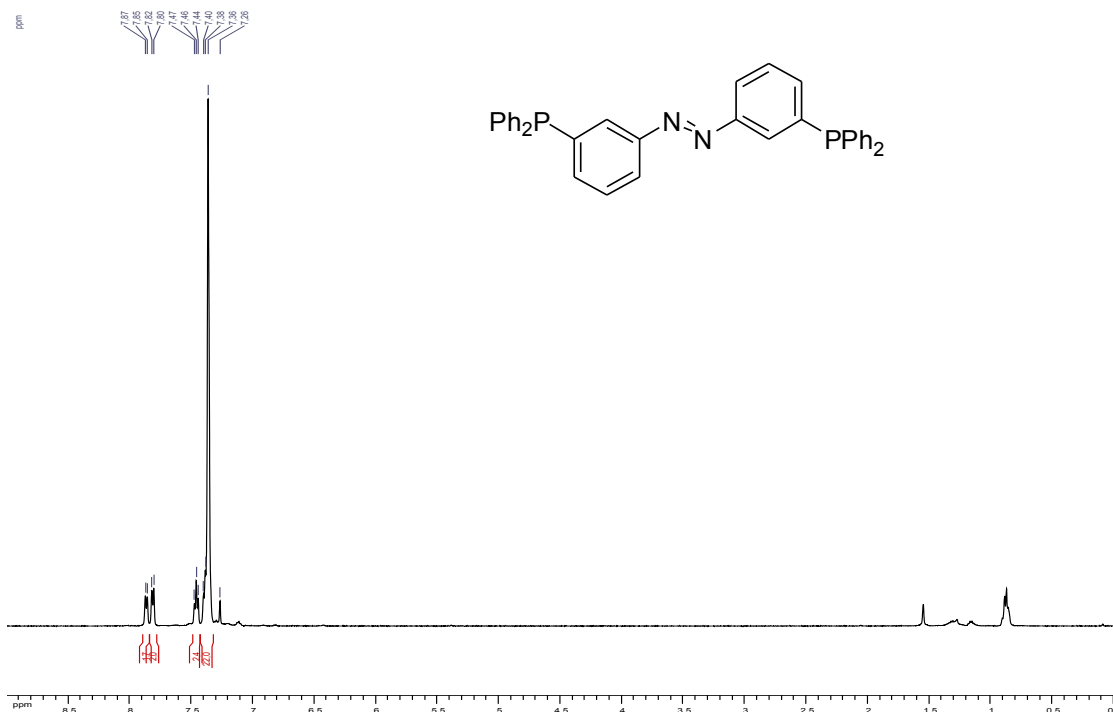

$^{13}\text{C}$  NMR ( $\text{CDCl}_3$ , 75 MHz):

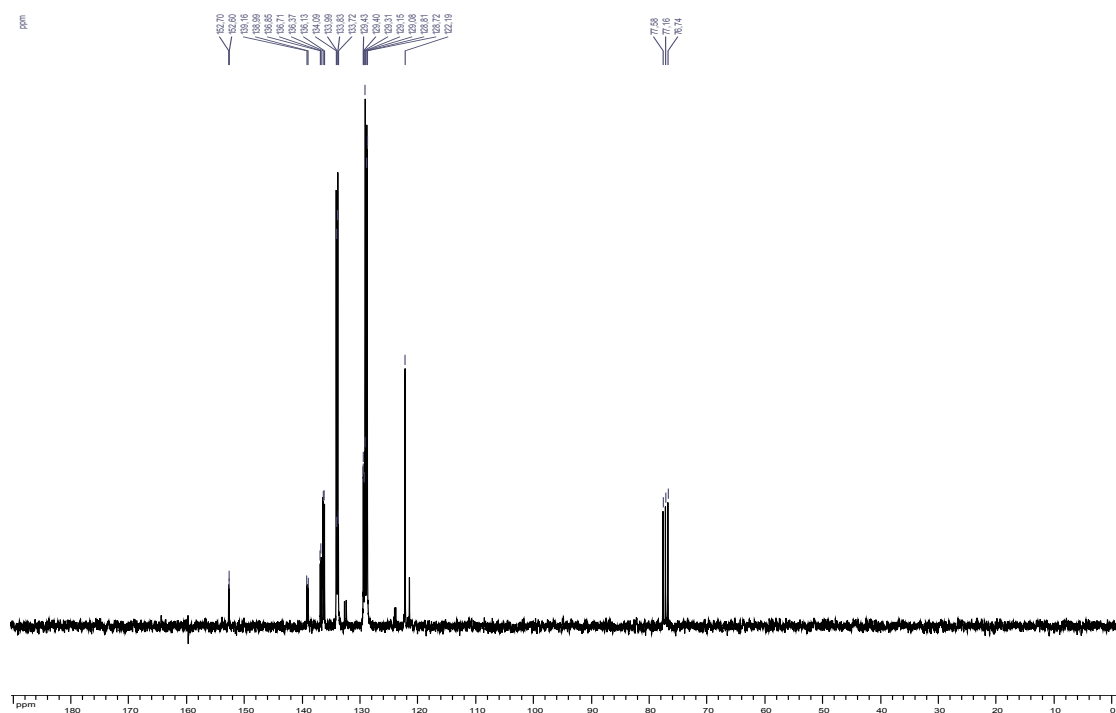

$^{31}\text{P}$  NMR ( $\text{CDCl}_3$ , 202 MHz):

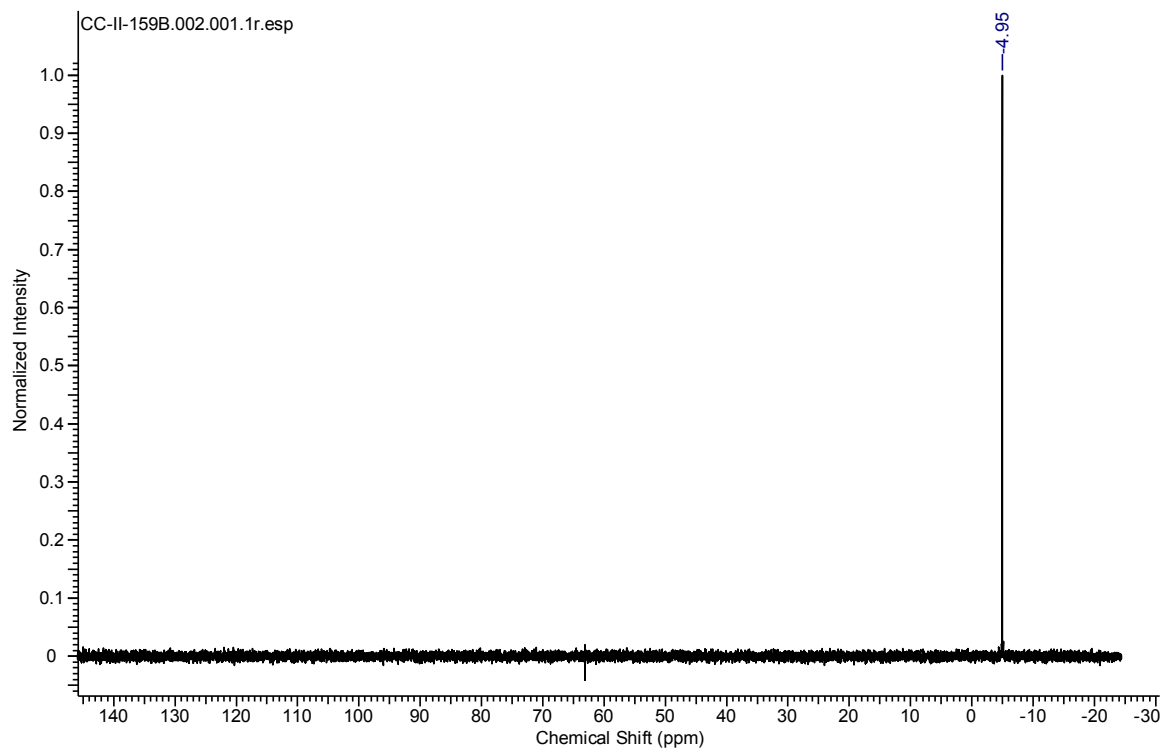

### III.2. Compound *E*-6

$^1\text{H}$  NMR ( $\text{CDCl}_3$ , 500 MHz):

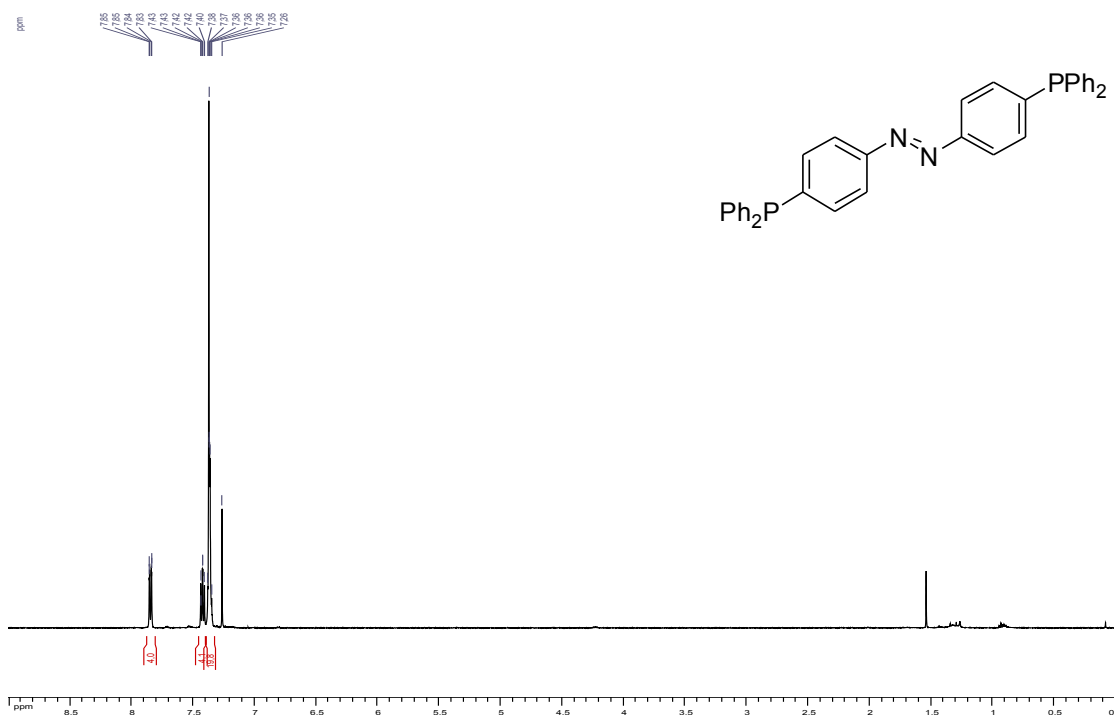

$^{13}\text{C}$  NMR ( $\text{CDCl}_3$ , 75 MHz):

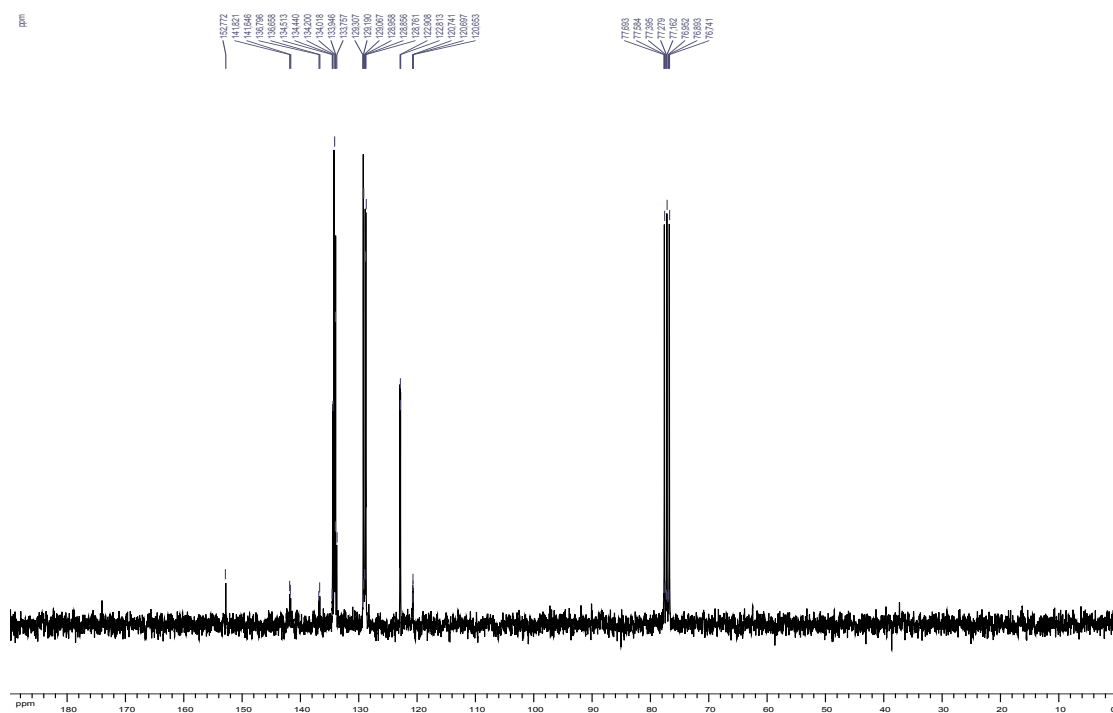

$^{31}\text{P}$  NMR ( $\text{CDCl}_3$ , 202 MHz):

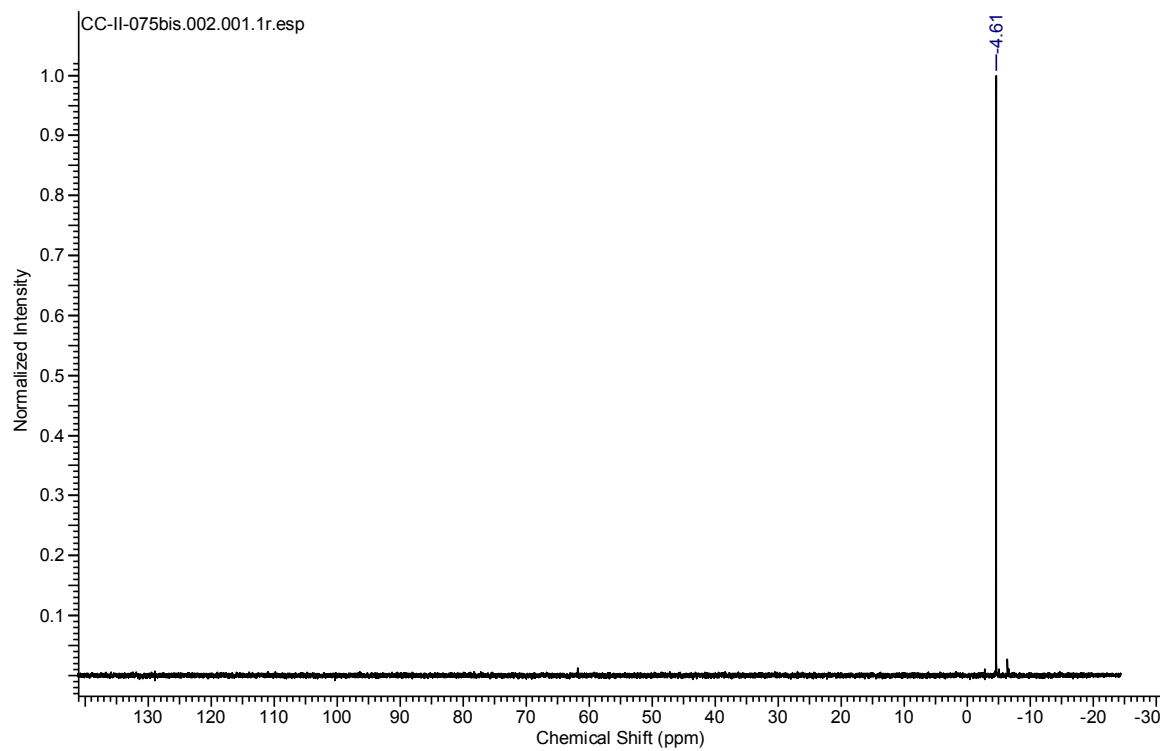

### III.3. Compound E-4.

$^1\text{H}$  NMR ( $\text{CDCl}_3$ , 300 MHz):

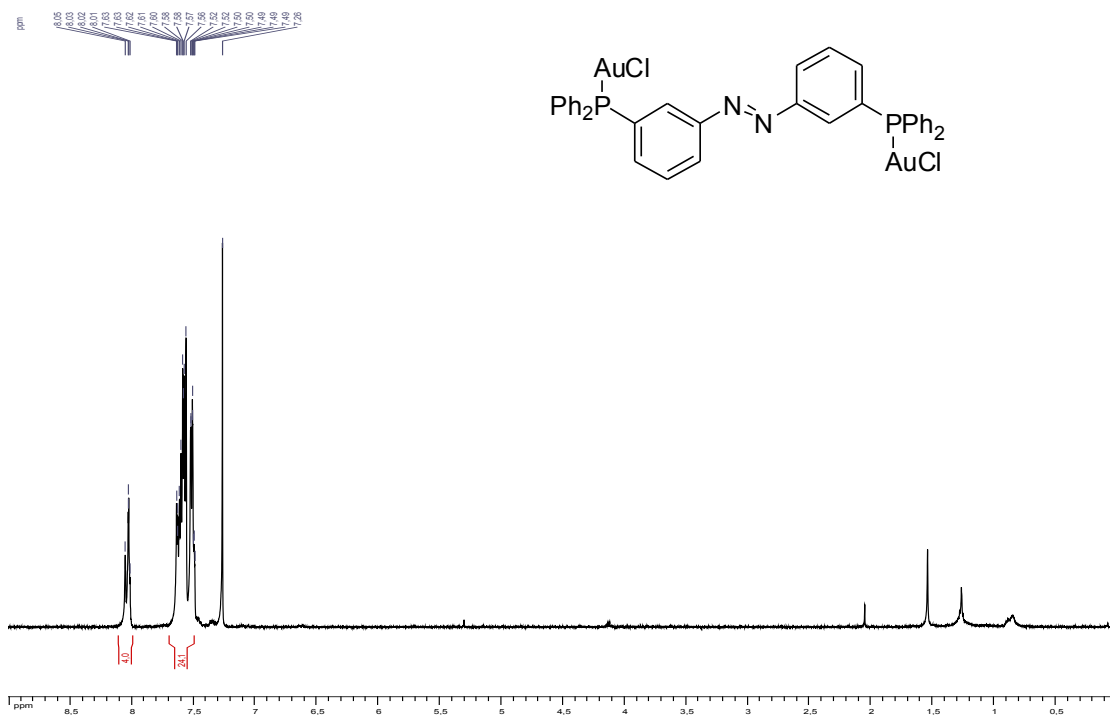

$^{13}\text{C}$  NMR ( $\text{CDCl}_3$ , 75 MHz):

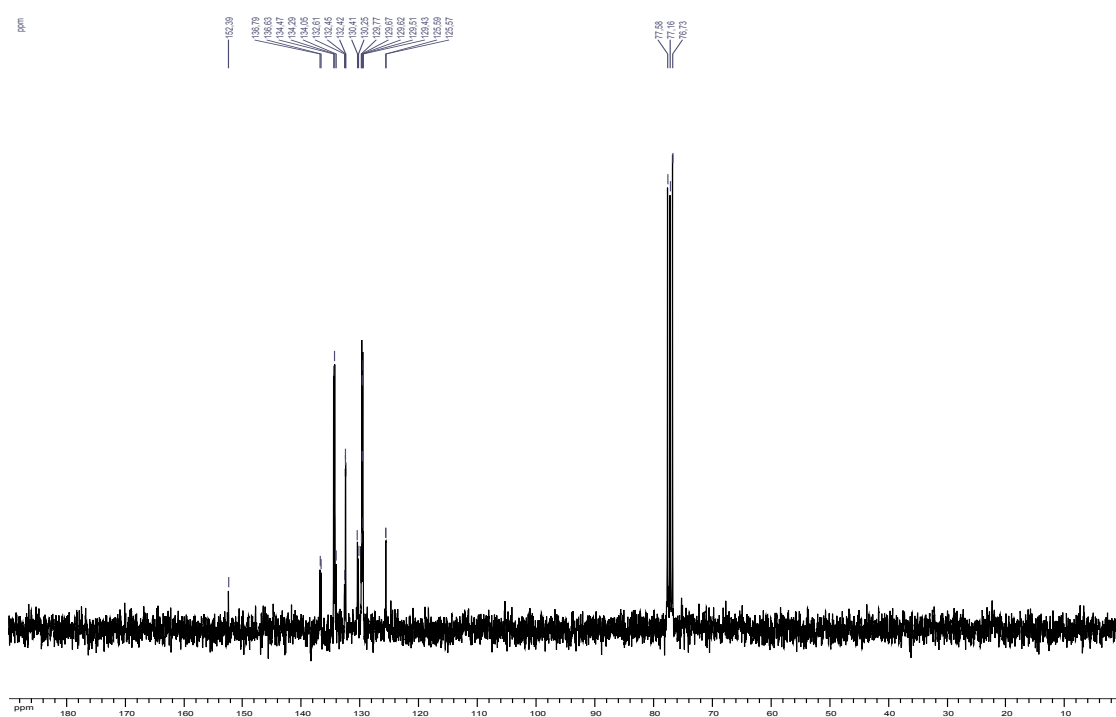

$^{31}\text{P}$  NMR ( $\text{CDCl}_3$ , 202 MHz):

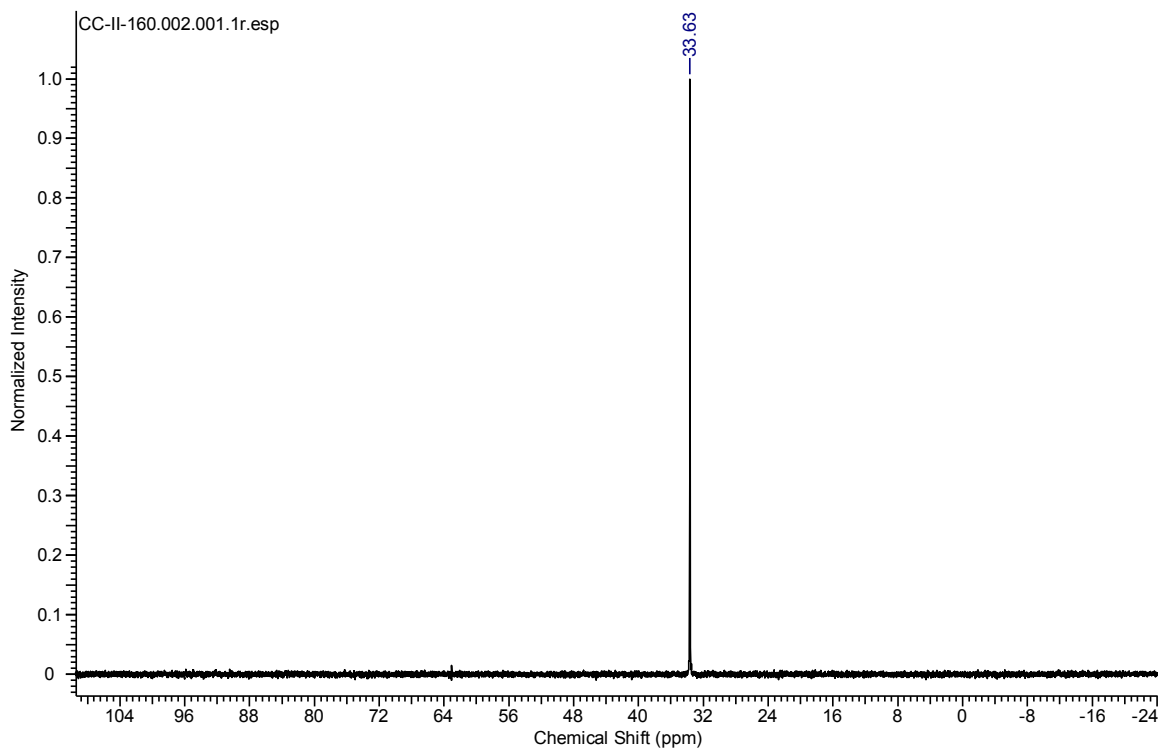

#### 4. Compound *E*-7

$^1\text{H}$  NMR ( $\text{CDCl}_3$ , 300 MHz):

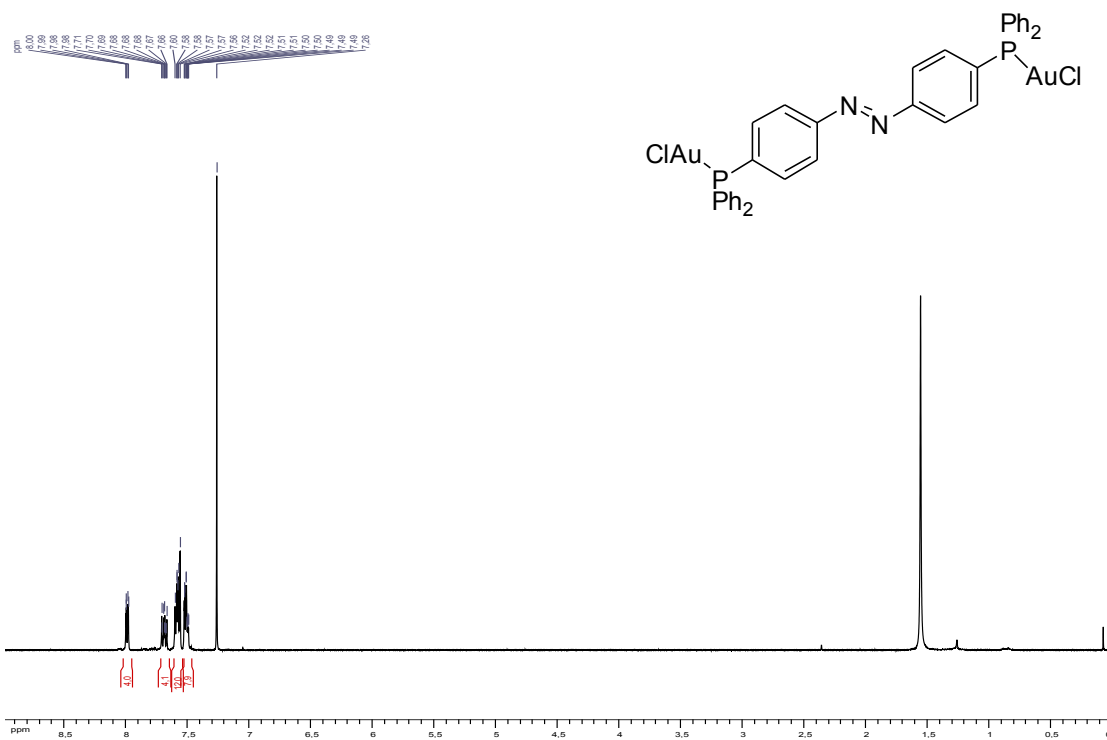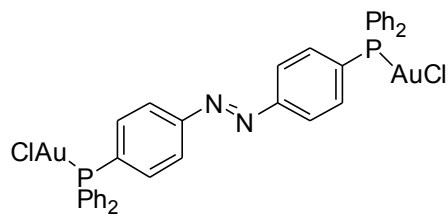

$^{13}\text{C}$  NMR ( $\text{CDCl}_3$ , 75 MHz):

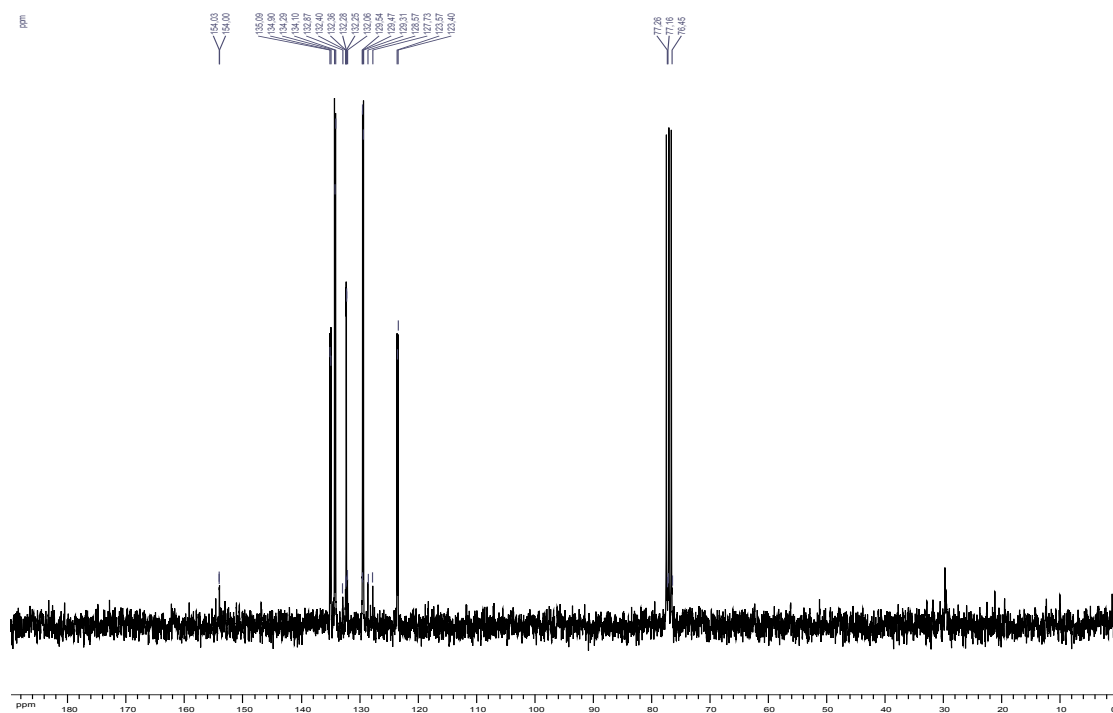

$^{31}\text{P}$  NMR ( $\text{CDCl}_3$ , 202 MHz):

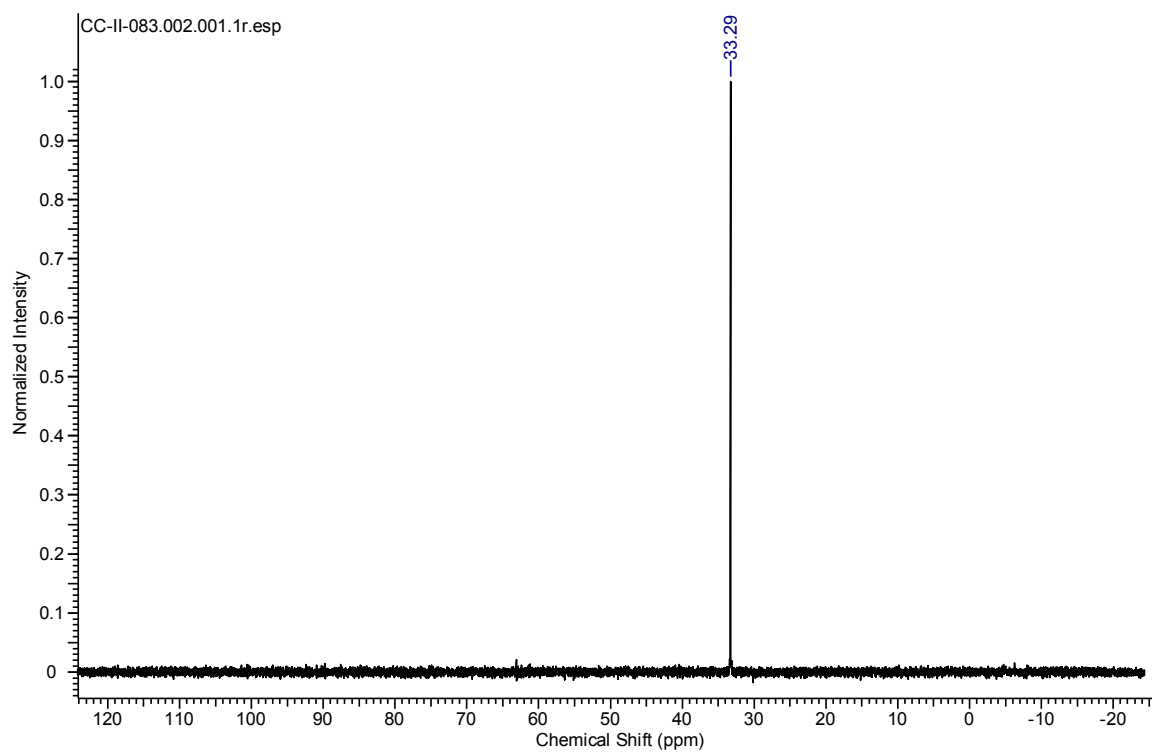



## VII. X-ray crystal Structure Determination

Orange single crystals suitable for X-ray diffraction studies were obtained for both isomers by slow evaporation of a chloroform solution and were transferred to an Enraf-Nonius kappa CCD diffractometer for X-ray Mo-K $\alpha$  radiation ( $\lambda = 0.71073 \text{ \AA}$ ) diffraction analyses at ambient temperature. Complete data were collected using a  $\varphi + \omega$  scan strategy derived by the COLLECT<sup>1</sup> software once the crystal orientation and cell parameters were determined from a  $10^\circ \varphi$  preliminary scan using the DENZO<sup>2</sup> software. A full hemisphere of data in  $\varphi$  sweep in of  $1.7^\circ$  ( $2.0^\circ$  resp. for **7**) oscillation per frame was completed by two (resp. three)  $\omega$  sweeps for a total of  $134.2^\circ$  ( $171.5^\circ$  resp. for **7**) angular range. The exposure rate was 75.0 (120.0 resp. for **7**) seconds per degree and the crystal-to-detector distance was fixed at 31.0 mm. The crystal parameters including the unit cell parameters were then processed according to the global refinement procedure implemented in the SCALEPACK<sup>2</sup> software. An empirical absorption correction was also applied using a spherical harmonics expansion of the absorption surface as implemented in the scaling program. Both structures were solved by direct methods (SHELXS-97)<sup>3</sup> in the same space group, P  $2_1/c$ , with different unit cell parameters but almost similar volumes, and refined on  $F^2$  by means of full-matrix least-squares methods (SHELXL).<sup>4</sup> Anisotropic thermal parameters were used for all non-hydrogen atoms whereas aromatic hydrogens, albeit located from difference Fourier maps, were refined as a riding model with  $U_{\text{iso}} = 1.2U_{\text{eq}}$  of the parent atom. Crystal data, data collection and structure refinement details are summarized in Table 1.

CCDC 1921650-1921651 (compounds **4**, and **7** respectively) contain the supplementary crystallographic data for this paper. These data can be obtained free of charge from The Cambridge Crystallographic Data Centre via [www.ccdc.cam.ac.uk/data\\_request/cif](http://www.ccdc.cam.ac.uk/data_request/cif).

1. Nonius, B. V. *COLLECT*, data collection software, **1999**.
2. Otwinowski, Z.; Minor, W. *Methods in Enzymology, Macromolecular Crystallography, part A*, Ed. C.W. Carter, Jr.; R.M. Sweet, New York: Academic Press, **1997**, 276, 307-326.
3. Sheldrick, G. M. *Acta Crystallogr., Sect. A: Found. Crystallogr.* **2008**, 64, 112-122.
4. Sheldrick, G. M. *Acta Crystallogr.* **2015** A71, 3-8.

Table SI2 Crystal data, data collection and structure refinement details for the two compounds.

| Identification code                   |                       | 4                                                                                             | 7                                                                                             |
|---------------------------------------|-----------------------|-----------------------------------------------------------------------------------------------|-----------------------------------------------------------------------------------------------|
| Empirical formula                     |                       | C <sub>36</sub> H <sub>28</sub> Au <sub>2</sub> Cl <sub>2</sub> N <sub>2</sub> P <sub>2</sub> | C <sub>36</sub> H <sub>28</sub> Au <sub>2</sub> Cl <sub>2</sub> N <sub>2</sub> P <sub>2</sub> |
| Formula weight                        |                       | 1015.38                                                                                       | 1015.38                                                                                       |
| Temperature                           | (K)                   | 293(2)                                                                                        |                                                                                               |
| Wavelength                            | (Å)                   | 0.71073                                                                                       |                                                                                               |
| Diffractionmeter (Enraf-Nonius FR590) |                       | Bruker KappaCCD                                                                               |                                                                                               |
| Crystal system, space group           |                       | Monoclinic, P2 <sub>1</sub> /c                                                                | Monoclinic, P2 <sub>1</sub> /c                                                                |
| Unit cell dimensions                  | a (Å)                 | 8.600(1)                                                                                      | 9.866(1)                                                                                      |
|                                       | b                     | 11.005(2)                                                                                     | 16.484(2)                                                                                     |
|                                       | c                     | 18.286(2)                                                                                     | 10.436(2)                                                                                     |
|                                       | α (°)                 | 90                                                                                            | 90                                                                                            |
|                                       | β                     | 103.40(2)                                                                                     | 94.944(3)                                                                                     |
|                                       | γ                     | 90                                                                                            | 90                                                                                            |
| Volume                                | (Å <sup>3</sup> )     | 1683.5(4)                                                                                     | 1690.9(4)                                                                                     |
| Z,                                    |                       | 2,                                                                                            | 2,                                                                                            |
| Calculated density                    | (g.cm <sup>-3</sup> ) | 2.003                                                                                         | 1.994                                                                                         |
| Absorption coefficient                | (mm <sup>-1</sup> )   | 8.987                                                                                         | 8.947                                                                                         |
| F(000)                                |                       | 960                                                                                           | 960                                                                                           |
| Crystal size                          | (mm)                  | 0.180 x 0.090 x 0.070                                                                         | 0.190 x 0.100 x 0.080                                                                         |
| θ range for data collection           | (°)                   | 3.059 to 26.351                                                                               | 2.471 to 25.346                                                                               |
| Limiting indices                      |                       | -10 ≤ h ≤ 10,<br>-12 ≤ k ≤ 13,<br>-22 ≤ l ≤ 22                                                | -11 ≤ h ≤ 11,<br>-18 ≤ k ≤ 19,<br>-12 ≤ l ≤ 12                                                |
| Reflections collected / unique Rint   |                       | 14564 / 3415<br>0.0485                                                                        | 19164 / 3089<br>0.0219                                                                        |
| Completeness to θ <sub>full</sub>     | (%)                   | 99.6                                                                                          | 99.8                                                                                          |
| Absorption correction                 |                       | Semi-empirical from equivalents                                                               |                                                                                               |
| Max and min transmission              |                       | 1.000 and 0.597                                                                               | 1.000 and 0.880                                                                               |
| Refinement method                     |                       | Full-matrix least-squares on F <sup>2</sup>                                                   |                                                                                               |
| Data / restraints / parameters        |                       | 3415 / 0 / 199                                                                                | 3089 / 0 / 199                                                                                |
| Goodness-of-fit on F <sup>2</sup>     |                       | 1.022                                                                                         | 1.001                                                                                         |
| Final R indices [I > 2σ(I)]           | R1                    | 0.0433                                                                                        | 0.0282                                                                                        |
|                                       | wR2                   | 0.0921                                                                                        | 0.0648                                                                                        |
| R indices (all data)                  | R1                    | 0.0903                                                                                        | 0.0582                                                                                        |
|                                       | wR2                   | 0.1108                                                                                        | 0.0757                                                                                        |
| Largest diff. peak and hole           | (e.Å <sup>-3</sup> )  | 1.596 and -1.399                                                                              | 0.926 and -0.912                                                                              |

Figure SI15. Ortep view of the molecular structure of compound **4**. Displacement ellipsoids are drawn at the 30% probability level. Hydrogen atoms are omitted for clarity.

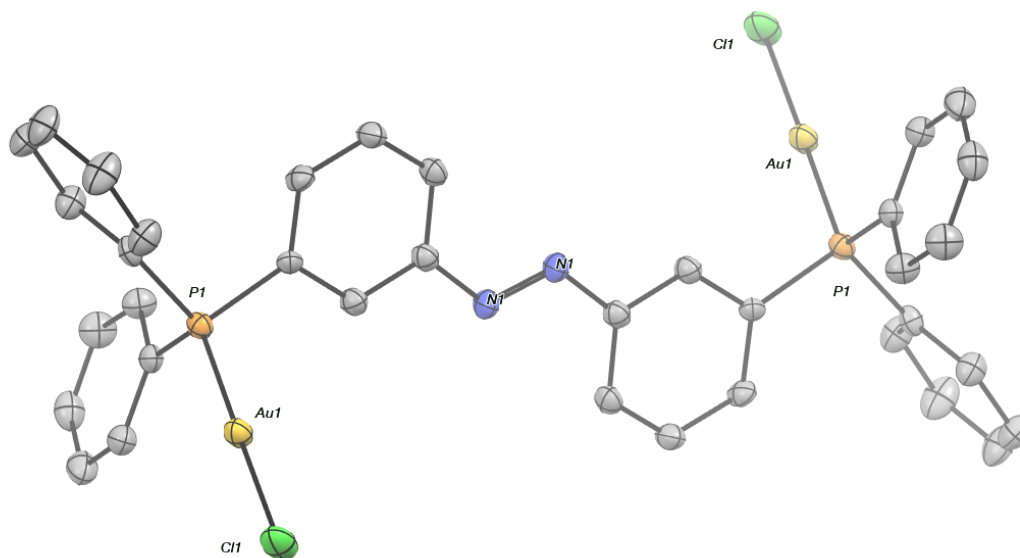

Figure SI16. Ortep view of the molecular structure of compound **7**. Displacement ellipsoids are drawn at the 30% probability level. Hydrogen atoms are omitted for clarity.

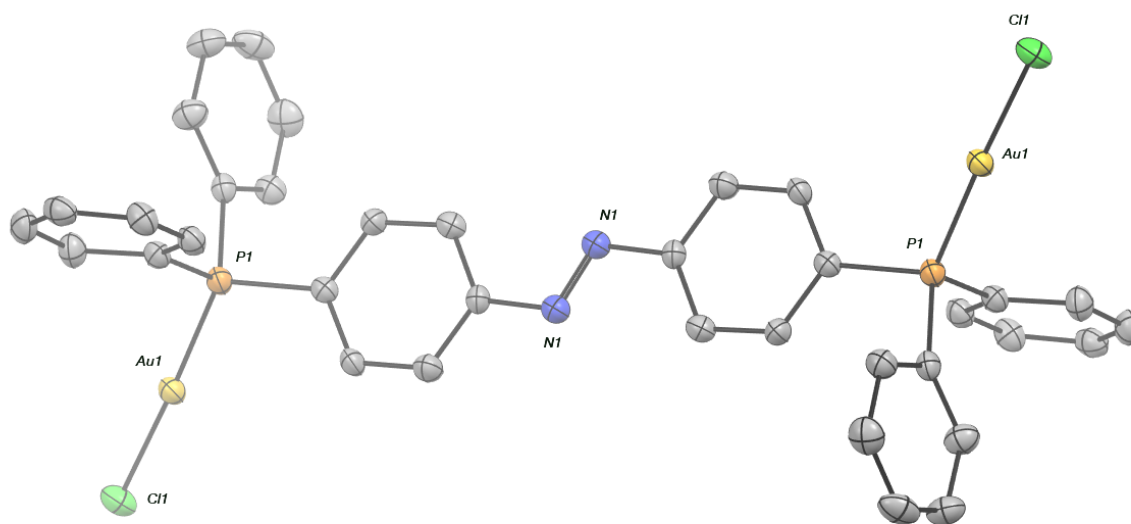

Supplement: d1dt01080h1.pdf [file d1dt01080h1.pdf]
